# Supplementary material for: Dual conductive network sensors based on an MXene/PDES supramolecular elastomer and their performance
Source: Royal Society of Chemistry journal article supplement (doi:10.1039/d3tc02890a), 2023-01-01
Supplement: d3tc02890a1.pdf [file d3tc02890a1.pdf]

## Dual conductive network sensors based on MXene/PDES supramolecular elastomer and its performance

Haoze Yuan, Peixing Li, Xinyu Wang, Cheng Yu, Xin Wang and Jutao Sun\*

Key Laboratory of Rubber-Plastics, Ministry of Education/Shandong Provincial Key Laboratory of Rubber-Plastics, Qingdao University of Science & Technology, PO Box 73, Qingdao266042, People's Republic of China.

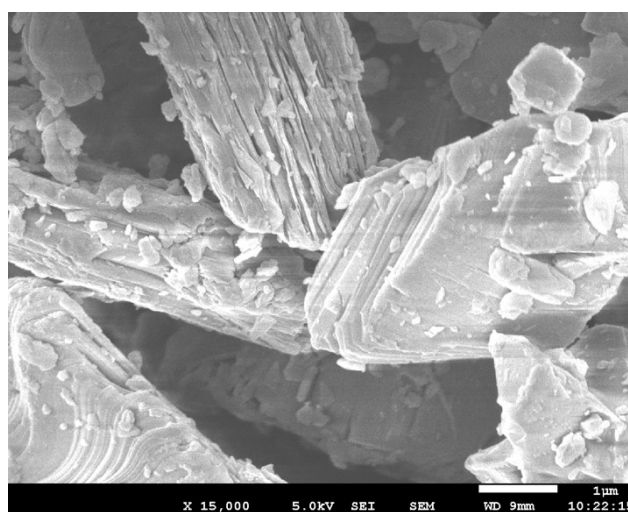

Figure S1. SEM images for the MAX phase.

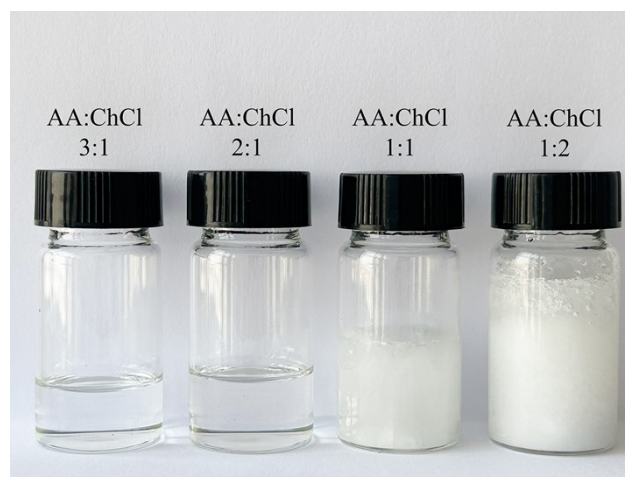

Figure S2. Digital images of PDES composed of different molar ratios (3:1 ~ 2:1) of AA: ChCl after cooling to room temperature.

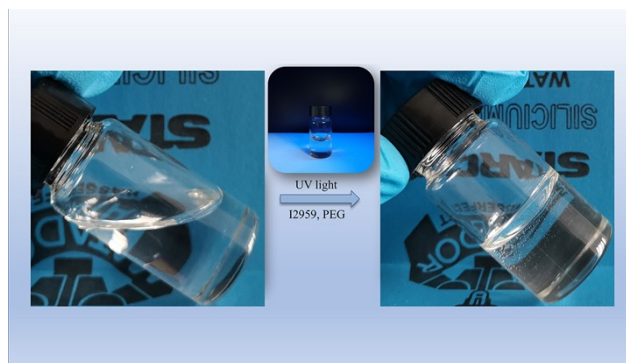

Figure S3. Comparative photos of PDES fluidity before and after polymerization.

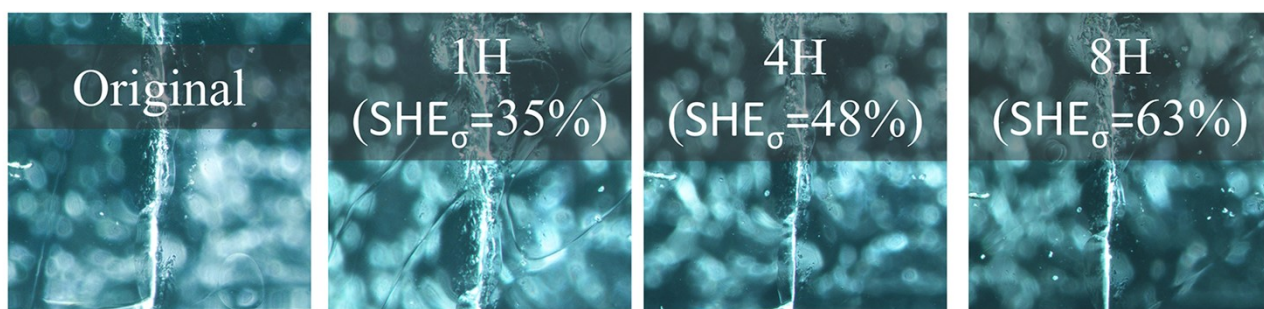

Figure S4. Optical microscopy of the surface damage of MDES-0 before and after 8h of healing.

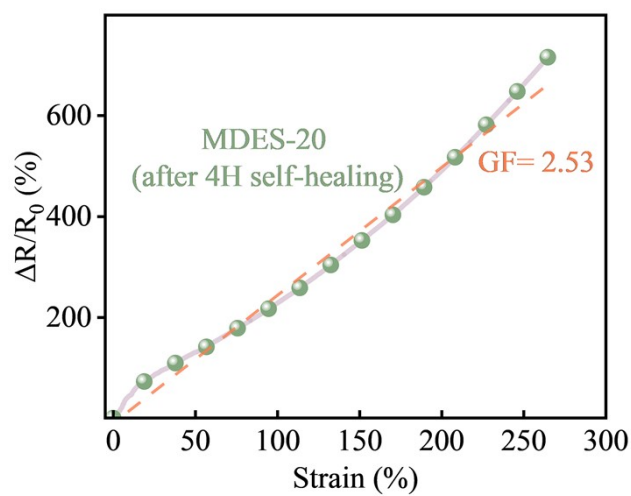

Figure S5 Relative resistance change of the MDES sensor after self-healing versus strain (0-264%).

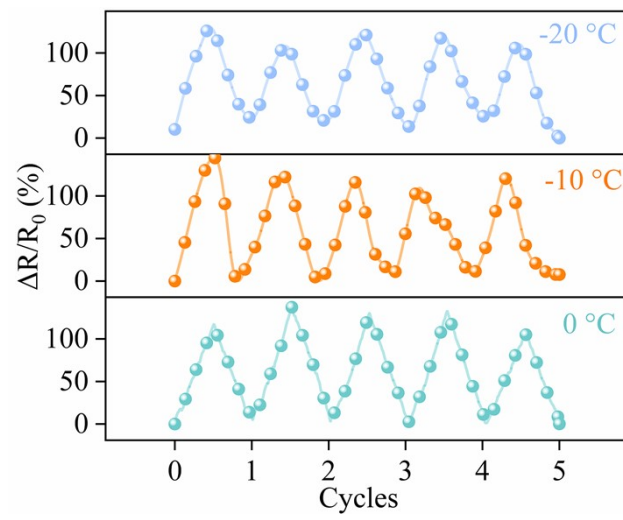

Figure S6 Cyclic strain sensing behaviour of the MDES sensor under low temperature environments (0 ~ -20 °C).
